# Supplementary material for: Effect of Sodium Hyaluronate on Antioxidant and Anti-Ageing Activities in Caenorhabditis elegans
Source: MDPI journal article supplement (doi:10.3390/foods12071400), 2023-03-26
Supplement: s1 [file s1]

## Supplementary Material

Table S1 Effect of SH on prolonging the lifespan of *C. elegans*

| Group    | N    | Mean lifespan (d)       | % Of control             | Maximum lifespans (d)   |
|----------|------|-------------------------|--------------------------|-------------------------|
| Control  | 90±1 | 15.33±0.58 <sup>a</sup> | 100.0 <sup>a</sup>       | 19.67±1.15 <sup>a</sup> |
| 200µg/mL | 89±2 | 16.83±0.29 <sup>b</sup> | 109.86±3.54 <sup>b</sup> | 23.67±0.58 <sup>b</sup> |
| 400µg/mL | 91±2 | 18 <sup>c</sup>         | 117.50±4.33 <sup>c</sup> | 25±1.73 <sup>c</sup>    |
| 800µg/mL | 92±1 | 18±1 <sup>c</sup>       | 117.50±7.95 <sup>c</sup> | 28.33±1.15 <sup>c</sup> |

Data were showed in mean ± SD, n = 3. Values with different letters in the same column indicate statistical significance ( $p < 0.05$ )

Table S2 Effects of SH on the fecundity of *C. elegans* (N=5)

| Concentration<br>(µg/mL) | Experimental group (N=5) |     |     |     |     | Mean ± SD           |
|--------------------------|--------------------------|-----|-----|-----|-----|---------------------|
|                          | 1                        | 2   | 3   | 4   | 5   |                     |
| 0                        | 310                      | 315 | 309 | 300 | 309 | 308±6 <sup>a</sup>  |
| 200                      | 337                      | 331 | 316 | 308 | 323 | 323±13 <sup>a</sup> |
| 400                      | 312                      | 317 | 326 | 314 | 321 | 318±5 <sup>a</sup>  |
| 800                      | 303                      | 318 | 334 | 308 | 319 | 316±11 <sup>a</sup> |

\*Data were showed in mean ± SD, n = 5. Note: Mean number of eggs laid is rounded and values with different letters in each group indicate: a significant difference between the two groups ( $p < 0.05$ )

Table S3 Protective effect of SH on heat stress injury of *C. elegans*

| Group    | N    | Mean lifespan (h)       | % Of control              | Maximum lifespans (h)   |
|----------|------|-------------------------|---------------------------|-------------------------|
| Control  | 91±1 | 8.0 <sup>a</sup>        | 100.0 <sup>a</sup>        | 13.33±2.31 <sup>a</sup> |
| 200µg/mL | 91±2 | 9.67±0.58 <sup>ab</sup> | 120.83±7.22 <sup>ab</sup> | 16.67±3.01 <sup>b</sup> |
| 400µg/mL | 87±3 | 10 <sup>b</sup>         | 125.0 <sup>b</sup>        | 15.33±1.15 <sup>c</sup> |
| 800µg/mL | 89±1 | 10 <sup>b</sup>         | 125.0 <sup>b</sup>        | 16.67±1.54 <sup>c</sup> |

Data were showed in mean ± SD, n = 3. Values with different letters in the same column indicate

statistical significance ( $p<0.05$ )

Table S4 Protective effect of SH on  $H_2O_2$  stress of *C. elegans*

| Group    | N    | Mean lifespan (h)       | % Of control              | Maximum lifespans (h)    |
|----------|------|-------------------------|---------------------------|--------------------------|
| Control  | 89±1 | 6.0 <sup>a</sup>        | 100.0 <sup>a</sup>        | 12.67±1.15 <sup>a</sup>  |
| 200µg/mL | 91±4 | 7.33±0.58 <sup>ab</sup> | 122.21±9.6 <sup>ab</sup>  | 14.33±0.58 <sup>ab</sup> |
| 400µg/mL | 87±2 | 7.67±0.58 <sup>ab</sup> | 127.78±9.6 <sup>ab</sup>  | 14.67±1.15 <sup>ab</sup> |
| 800µg/mL | 90±1 | 11.67±1.15 <sup>c</sup> | 194.45±19.27 <sup>b</sup> | 17.33±1.55 <sup>b</sup>  |

Data were showed in mean ± SD, n = 3. Values with different letters in the same column indicate statistical significance ( $p<0.05$ )

Table S5 List of used for rt-PCR assays

| Gene's name    | Forward (5'-3')           | Reverse (5'-3')          |
|----------------|---------------------------|--------------------------|
| $\beta$ -actin | GCCGTGTTCCCATCCATTGT      | CCTCTCTTGATTGGGCCTC      |
| <i>daf-2</i>   | TGAAAGCGAAGCAGGAGAAGG     | CGTCCGAACCTCCGCATCACTC   |
| <i>daf-16</i>  | GCGGAGCCAAGAAGAGGATA      | GTTTCGGGGACGGAAAGATGA    |
| <i>sod-3</i>   | ATCACTATTGCGGTTCAAGGCTCTG | TTGCACAGGTGGCGATCTTCAAG  |
| <i>gst-4</i>   | TTGATGCTCGTGCTCTTGCT      | CGTTGGCTTCAGCTTTGACC     |
| <i>shn-1</i>   | GGTCTCCGTTGGCGTGATGATC    | CTGGTGGATGCTCGGTGAGTATTG |

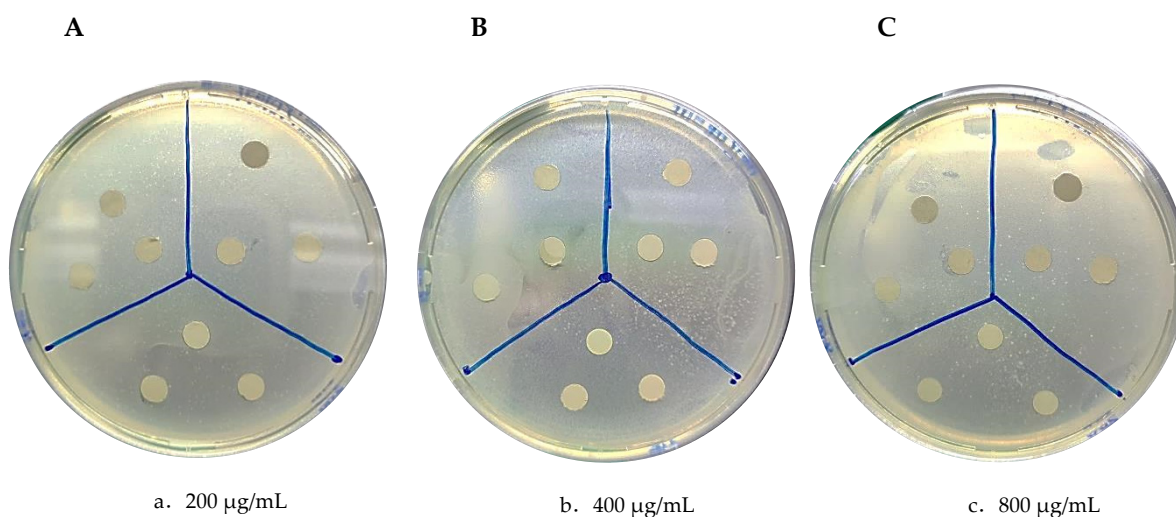

Figure S1 Drug sensitivity test of SH against *Escherichia coli* OP50. The three plates shown are all NGM (d=90 mm); each plate was divided equally into three parts, 400  $\mu$ l OP50 was taken and spread evenly on the plate, and the bacterial solution was allowed to dry before being pasted onto circular paper sheets (d=5 mm) containing SH solution. a. 200  $\mu$ g/ml of SH solubility; b. 400  $\mu$ g/ml of SH concentration; c. 800  $\mu$ g/ml of SH concentration. In each group, all the paper sheets were surrounded by the appearance of inhibition circles.
